# Supplementary material for: Genome sequence of the palaeopolyploid soybean
Source: Springer Nature journal article supplement (doi:10.1038/nature08670), 2010-01-01
Supplement: 41586_2010_BFnature08670_MOESM309_ESM.pdf [file 41586_2010_BFnature08670_MOESM309_ESM.pdf]

## SUPPLEMENTARY INFORMATION

## S1. Genome Sequencing, Assembly and Mapping

Ordering, orienting, and validation of genomic WGS scaffolds to produce chromosomal pseudomolecule sequences required a combination of resources: a large consensus genetic map, a new genetic map built specifically to aid in the pseudomolecule assembly, a manually curated physical map, additional clone pairs not used in the primary assembly, genetic sequence landmarks such as centromeres and telomeres, and synteny comparisons within soybean.

### S1.1. Construction of (preliminary) 6.5x scaffold assemblies, using the Arachne assembler <sup>1</sup>.

Provisional scaffold assemblies were constructed at the stage of 6.5x WGS coverage in order to assess sequencing and assembly characteristics, and extent of marker anchoring. The 6.5x assembly consisted of 993,511,522 bases, in 3,119 scaffolds. Most of the sequence was contained in large scaffolds: the N50 was 6.5 Mb, and 97.6% of the sequence was in 364 scaffolds larger than 100 kb.

### S1.2. Placement of markers from the 4.0 composite genetic map on the 6.5x scaffold assemblies, and assessment of scaffolds with insufficient or uneven marker coverage.

Markers from the 4.0 consensus map <sup>2</sup> were placed on the scaffolds using the top e-PCR match <sup>3</sup> (parameters -n 3 -g1 -t3 -m 400 -d400-800, with the best-scoring match chosen in cases of multiple matches), then the top blastn hit <sup>4</sup>. At this stage, a total of 4,634 markers could be located on the draft scaffolds. If markers had been distributed evenly in the genomic sequence, markers would have been located approximately every 214 kb in the scaffolds. However, marker coverage in genomic sequence is uneven, with generally higher densities in euchromatic regions, where repeat densities are lower and unique primers are more easily identified. In actuality, 83 of the 6.5x scaffolds greater than 100 kb had no markers, with the largest marker-less scaffold being 1.2 Mb.

### S1.3. Design of additional markers, using SNPs designed from placement of *G. soja* genomic sequence reads on the 6.5x *G. max* 'Williams 82' scaffold sequences.

To provide additional marker coverage, new SNP markers were designed from short sequence reads of the *G. soja* genotype PI 468916 mapped onto the *G. max* 'Williams 82' scaffolds. The 33 bp sequence reads were generated using the Illumina Genome Analyzer sequencing platform, from a reduced representation genomic sequence library <sup>5</sup>. Markers were selected from 491,115 reads that mapped to non-chloroplast, non-

mitochondrial soybean genomic DNA. Read mappings were determined with the MAQ software <sup>6</sup>. A total of 1,536 markers were chosen from 20,119 identified SNPs, according to the following priorities (in order of decreasing importance): scaffolds > 100 kb without markers; scaffold regions without markers within 500 kbp of a scaffold end; scaffolds with less than 1 cM separation between distal markers; scaffolds with internal marker-less gaps greater than 1 Mbp. The 1,536 selected markers were used to construct an Illumina GoldenGate “oligo pool all” (SoyOPA-4), for mapping, as described in the next step.

**S1.4. Construction of a genetic map in the 'Williams 82' x *G. soja* mapping population.** A high-resolution genetic map was created using a mapping population of 444 recombinant inbred lines (RILs) from the cross of 'Williams 82' x *G. soja* PI 468916 (the 'W82x486' map) <sup>5</sup>. These were genotyped with 1804 markers: 550 of them from an earlier map, to help associate the previous and new maps; and 1,254 of them from the set of 1,536 designed on the 6.5x scaffolds.

**S1.5. Construction of the 8x scaffold assemblies.** Once the final data collection phase of sequencing was completed based on an estimate of additional sequence needed from the 6x assembly, a total of 15,332,163 reads (see Table S1 for clone size breakdowns) were assembled with a modified version of Arachne (Jaffe et al., 2003) v.20071016 with parameters maxcliq1=90, correct1\_passes=0 and BINGE\_AND\_PURGE=True to form 3,363 scaffolds covering 969.6Mb of the soybean genome (see Table S2 for scaffold and contigs totals).

| Library Type | Average Insert Size | Read Number | Assembled Sequence Coverage (X) |
|--------------|---------------------|-------------|---------------------------------|
| 3kb          | 3,287               | 5,337,808   | 2.91                            |
| 8kb (1)      | 6,547               | 2,626,278   | 1.36                            |
| 8kb (2)      | 6,806               | 3,261,934   | 1.76                            |
| 8kb (3)      | 8,106               | 1,954,318   | 0.96                            |
| Fosmid (1)   | 35,461              | 499,391     | 0.24                            |
| Fosmid (2)   | 36,675              | 991,002     | 0.47                            |
| Fosmid (3)   | 37,447              | 305,275     | 0.15                            |
| BAC (GM_WBa) | 113,756             | 59,286      | 0.03                            |
| BAC (GM_WBb) | 133,543             | 121,680     | 0.09                            |
| BAC (GM_WBc) | 135,292             | 175,191     | 0.07                            |
| <b>Total</b> |                     | 15,332,163  | 8.05                            |

**Table S1.** Genomic libraries included in the soybean genome assembly and their respective assembled sequence coverage levels in the final release.

| Size      | Number | Contigs | Scaffold Size | Basepairs   | % Non-gap Basepairs |
|-----------|--------|---------|---------------|-------------|---------------------|
| 5,000,000 | 64     | 10,124  | 591,926,032   | 587,605,388 | 99.27%              |
| 2,500,000 | 111    | 12,873  | 756,646,961   | 751,670,694 | 99.34%              |
| 1,000,000 | 194    | 15,366  | 894,763,142   | 889,167,252 | 99.37%              |
| 500,000   | 249    | 16,465  | 934,295,162   | 927,815,889 | 99.31%              |
| 250,000   | 292    | 17,546  | 950,004,922   | 942,041,880 | 99.16%              |
| 100,000   | 368    | 18,923  | 962,641,918   | 951,116,174 | 98.80%              |
| 50,000    | 439    | 19,623  | 967,493,271   | 954,172,409 | 98.62%              |

|        |       |        |             |             |        |
|--------|-------|--------|-------------|-------------|--------|
| 25,000 | 559   | 20,378 | 972,479,545 | 956,358,413 | 98.34% |
| 10,000 | 889   | 21,355 | 977,117,651 | 960,461,820 | 98.30% |
| 5,000  | 1,787 | 23,555 | 983,239,271 | 965,409,031 | 98.19% |
| 2,500  | 2,994 | 25,894 | 987,884,399 | 969,135,187 | 98.10% |
| 1,000  | 3,363 | 26,341 | 988,480,365 | 969,681,045 | 98.10% |
| 0      | 4,262 | 27,240 | 989,039,777 | 970,240,457 | 98.10% |

**Table S2.** Summary statistics of the output of the whole genome shotgun assembly, before breaking and constructing chromosome scale pieces. The table shows total contigs and total assembled basepairs for each set of scaffolds greater than the given size.

**S1.6. Placement of markers from the 4.0 composite map and the W82x486 map on the 8x scaffold assemblies.** Markers from the 4.0 consensus map <sup>2</sup> and the W82x486 map <sup>5</sup> were placed on the scaffolds using the top e-PCR match <sup>3</sup> where possible, and otherwise using the top BLAST hit <sup>4</sup>.

**S1.7. Construction of provisional pseudomolecules by ordering and orienting (O&O) the 8x scaffold assemblies.** A first approximate ordering and orienting (O&O) was made by positioning scaffolds by average cM value of marker positions in scaffolds. Initial orientations were determined by comparing cM values of first and last markers in the scaffold. Both genetic maps described above were used for this stage. An O&O based exclusively on genetic map data is subject to several kinds of problems. First, although the consensus map is remarkably large, the genetic resolution is low because the mapping populations are small. The map was constructed from five mapping populations, each having approximately 100 individuals. The W82x468 has higher resolution in some regions, but fewer markers, and apparent distortion in some chromosomal regions. Second, in pericentromeric regions, which constitute roughly half of the sequence space, there is very little recombination. In 37% of the mapped scaffolds, the maximum cM separation is less than 2 cM. Third, markers are rare in the large pericentromeres because unique sequences suitable for marker design are relatively rare in these highly repetitive regions. This means many large scaffolds have too few markers to determine an orientation, and some scaffolds have no markers in the consensus map. Fourth, outlying markers at the scaffold ends may distort the calculation of orientation. For example, a scaffold might have markers with cM values 9, 8.7, 10, 10.1, 10.3, 8.5 (in order along the scaffold). A simple automated ordering procedure

might conclude that this scaffold should be flipped, based on the first and last positions (9 and 8.5), whereas a close look at the markers would suggest that a positive orientation is more likely.

**S1.8. Assessment of scaffold integrities for marker contiguity, and draft pseudomolecules for correctness of scaffold O&O.** To address the deficiencies in the first-pass ordering on the consensus map, we used a combination of additional physical map resources, synteny comparisons, and genomic characteristics and landmarks.

**S1.8.1. Evaluation of synteny in genome self-comparisons.** Even using the higher-resolution map as well as physical map information, many scaffolds were either too small or the genomic region had too little recombination to allow precise placements or orientations. To resolve such cases, we evaluated dot plots of the soybean genome to itself, as well as genomic landmarks (ribosomal arrays, centromeric and telomeric sequences, and densities of repeats, genes, and GC content). In a dot plot of sequence matches between two chromosomes, regions with extended homology appear as diagonal features or “synteny blocks.” Multiple episodes of polyploidy in the extended evolutionary history of *Glycine* mean that any given region usually matches at least one, and usually three or more other regions. Older synteny blocks are more degraded than recently derived blocks and can be obscured by repetitive DNA. To reduce noise from repetitive DNA, we used custom Perl scripts to mask all but predicted genes, and then compared translations of the remaining genic nucleotide sequences using the promoter program from the MUMmer package <sup>7</sup>. Further, we considered only the top reciprocal best matches between any two chromosomes in a comparison. Plots for each chromosome pair were generated using custom Perl scripts and gnuplot. For each evaluation round, we examined all plots visually (400 per genome comparison in total, or 210 unique comparisons). Potential scaffold misorientations appear as a slope sign change, with the inversion breakpoints occurring precisely at scaffold boundaries. Potential scaffold misplacements appear as horizontal or vertical translations (shifts) in part of a synteny block. Potential scaffold shifts or reorientations were checked against marker and physical map constraints before revising the O&O.

**S1.8.2. Evaluation of genomic landmarks and features.** Eight of the chromosomes have telomeric repeats (TTTAGGG or CCCTAAA) in both of the distal scaffolds and 11 other chromosome have telomeric repeats found on a single arm. Also, internal scaffolds in 19 of 20 chromosomes contain a

large block of characteristic 91- or 92-basepair pericentromeric repeats<sup>8,9</sup>. These arrays of centromeric satellite repeats were checked for contiguity and placement within each chromosome. Other features that were considered included gene- and repeat-density gradients, as well as dinucleotide signature<sup>10</sup>.

**S1.8.3. Evaluation of additional clone pairs.** Not all clone pairs are included in the Arachne assembly because they fall outside of the expected BAC clone size range, but may still be considered and used to provide supporting evidence for O&O. Using blast and stringent match parameters (require a single match at  $\geq 99\%$  identity and  $\geq 99\%$  of BAC-end length), these “extra” clone-pairs spanned and validated approximately 26% of the scaffold pairs in the assembly. In some cases, large numbers of clone pairs established the association. In others, single clones span the gap, in which case we required additional information before determining scaffold O&O.

**S1.8.4. Comparison with the physical map.** The soybean cv. Williams 82 physical map, a product of the NSF SoyMap project<sup>11</sup>, comprises, as of the June 2008 version, 1,745 contigs, incorporating 141,617 BACs from primarily three libraries: GM\_WBa (35,145), GM\_WBb (61,379), GM\_WBc (37,658), as well as 7,435 from a minimal tile of an existing FPC map of the Forrest cultivar. The Williams 82 map was constructed using the SNaPshot restriction enzyme fingerprinting technique<sup>12</sup> and assembled using the FPC software FingerPrinted Contigs;<sup>13</sup>. The FPC software program contains tools that were developed during the course of the soybean project<sup>14</sup> to facilitate and analyze the alignment of draft sequence to an FPC map. For the 8x assembly, a detailed analysis indicated 51 potential scaffold edits, including 32 scaffold breaks (misassemblies) and 19 scaffold merges (i.e., scaffold pairs bridged by an FPC contig).

**S1.8.5. Comparison of genetic and genomic distances.** A final quality control step used comparisons of genetic and physical (sequence) distances, in the form of plots of genetic vs. physical distances (Figure S1). All show similar patterns of markedly diminished recombination (flat central slope) in broad pericentromeric regions, and consistent recombination (rising slopes) at chromosome ends. In several assembly iterations, scaffold misplacements were visible as discontinuities or negative slopes.

**S1.9. Splitting of chimeric scaffolds, and iterations of steps 5 through 9 until reaching a satisfactory 1.0 candidate.** Evaluation of a draft O&O identified chimeric scaffolds – evident, for

example, when one end of a scaffold contained multiple markers from another linkage group. To determine the location of the misassembly, we considered clone coverage (particularly, looking for spots with little or no coverage), synteny comparisons, physical map comparisons, and other genomic gradients and features. After identifying a region in which to make a scaffold split, the Arachne assembler was run again, with constraints against particular contig joins. Over the course of five intermediate assemblies, 46 scaffolds were broken relative to the initial Arachne 8x build.

**S1.10. Generation of the 1.01 pseudomolecules in Arachne.** We then ordered the scaffolds with Arachne, making 322 joins to create 20 chromosome size pseudomolecules. We orientated each scaffold and joined them with 1000 N bps. We then compared the scaffolds again against the genetic map to verify the accuracy of our ordering, and reordered the scaffolds for the release according to order of the soybean genetic map. We classified the remaining scaffolds in various bins depending on sequence content. We identified contamination using megablast against Genbank NR and blastp against a set of known microbial proteins. 90 scaffolds were identified as prokaryotic contamination. We classified additional scaffolds as unanchored rDNA (143), mitochondrion (18), chloroplast (81), small unanchored repetitive scaffolds as defined by 95% of the 24mers occurring greater than four times in the large scaffolds (788). We also removed 542 scaffolds that were less than 1kb in sequence length. We appended the remaining 1,148 scaffolds putatively soybean scaffolds to the 20 chromosome scaffolds. The resulting final statistics are shown in Table S3.

|                                |                     |
|--------------------------------|---------------------|
| <b>Scaffold total</b>          | 1,168               |
| <b>Contig total</b>            | 16,311              |
| <b>Scaffold sequence total</b> | 973.3 MB            |
| <b>Contig sequence total</b>   | 955.1 MB (1.9% gap) |
| <b>Scaffold N/L50</b>          | 10/47.8 MB          |
| <b>Contig N/L50</b>            | 1492/189.4 KB       |

**Table S3.** Final summary assembly statistics for chromosome scale assembly.

|                                                           | <b>Raw Bps<br/>(phred20s)</b> | <b>Assembled<br/>Bps</b> | <b>Coverage</b> | <b>Estimated Mbps at<br/>Genome Coverage</b> |
|-----------------------------------------------------------|-------------------------------|--------------------------|-----------------|----------------------------------------------|
| <b>Assembled chromosomes</b>                              | 7,538,817,779                 | 937,319,251              | 8.04            | 937.32                                       |
| <b>Unmapped scaffolds</b>                                 | 98,135,309                    | 17,735,586               | 5.53            | 12.20                                        |
| <b>Unanchored rDNA</b>                                    | 76,472,810                    | 1,128,931                | 67.74           | 9.51                                         |
| <b>Excluded repetitive<br/>scaffolds</b>                  | 28,890,682                    | 6,380,793                | 4.53            | 3.59                                         |
| <b>Unassembled repetitive<br/>reads (&gt;50% &gt;=40x</b> | 787,023,270                   | 787,023,270              | 1.00            | 97.85                                        |

|                      |  |  |  |          |
|----------------------|--|--|--|----------|
| <b>24mers)</b>       |  |  |  |          |
| <b>Total sampled</b> |  |  |  | 1,060.47 |

**Table S3.1** Amount of soybean genome sampled by WGS sequence.

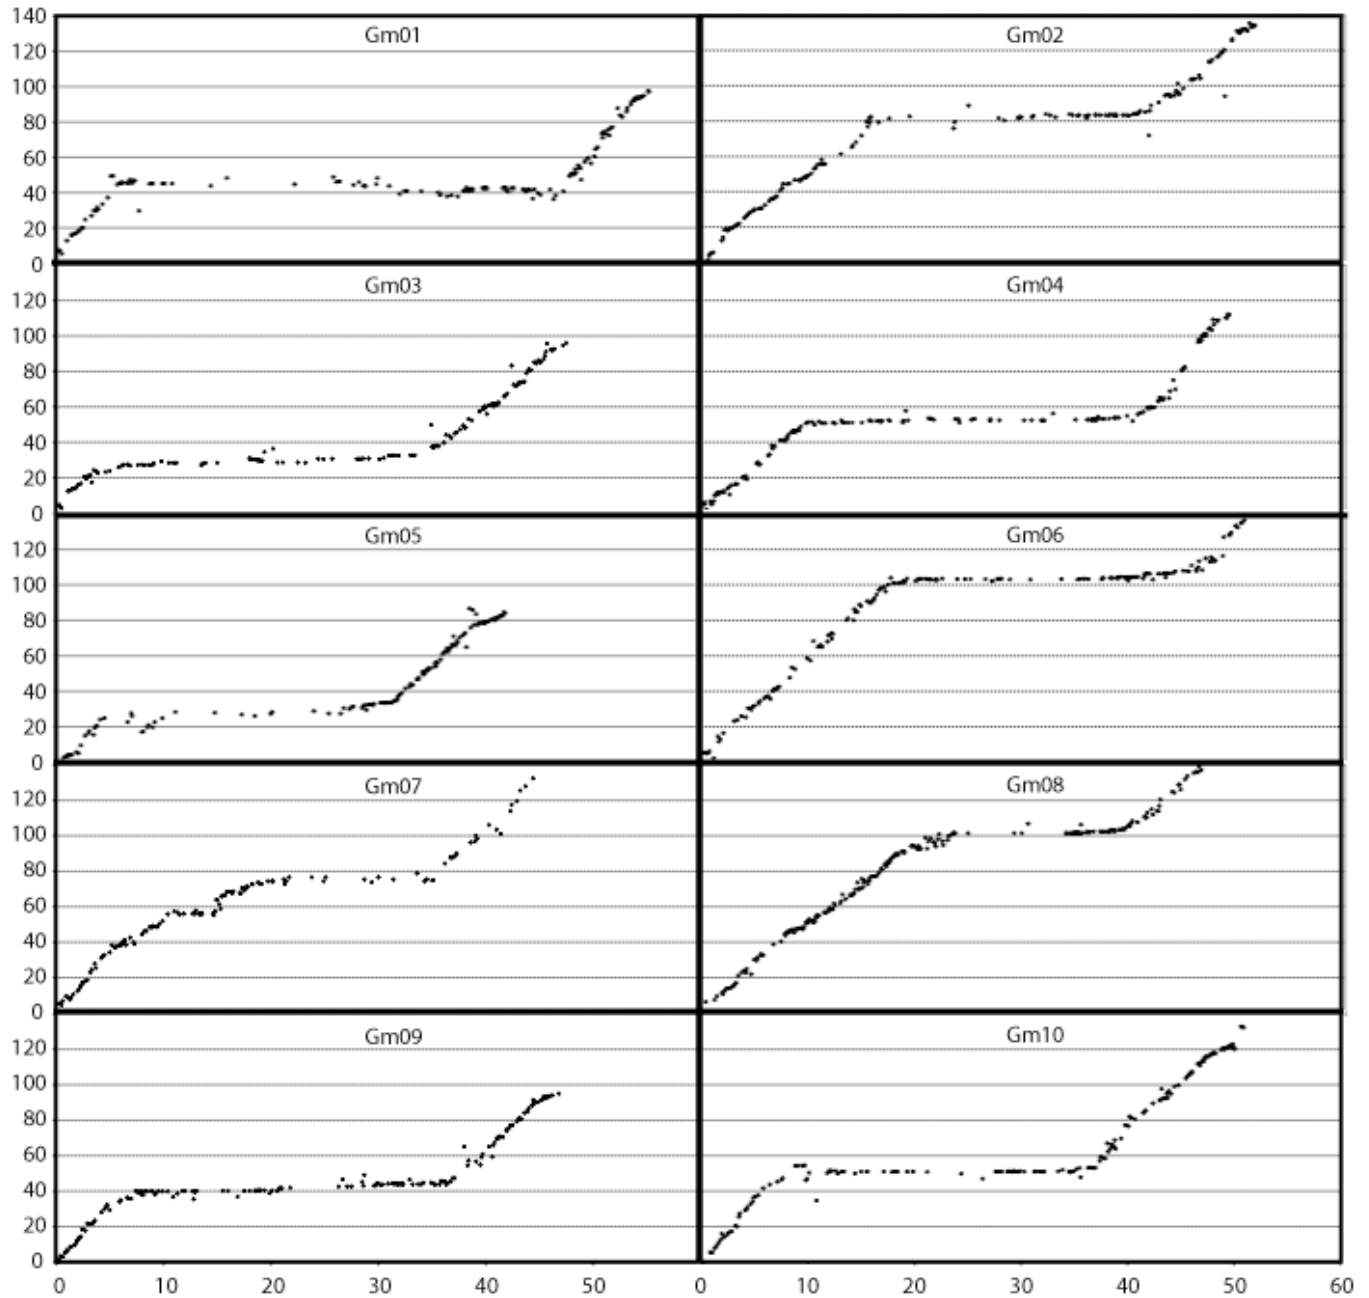



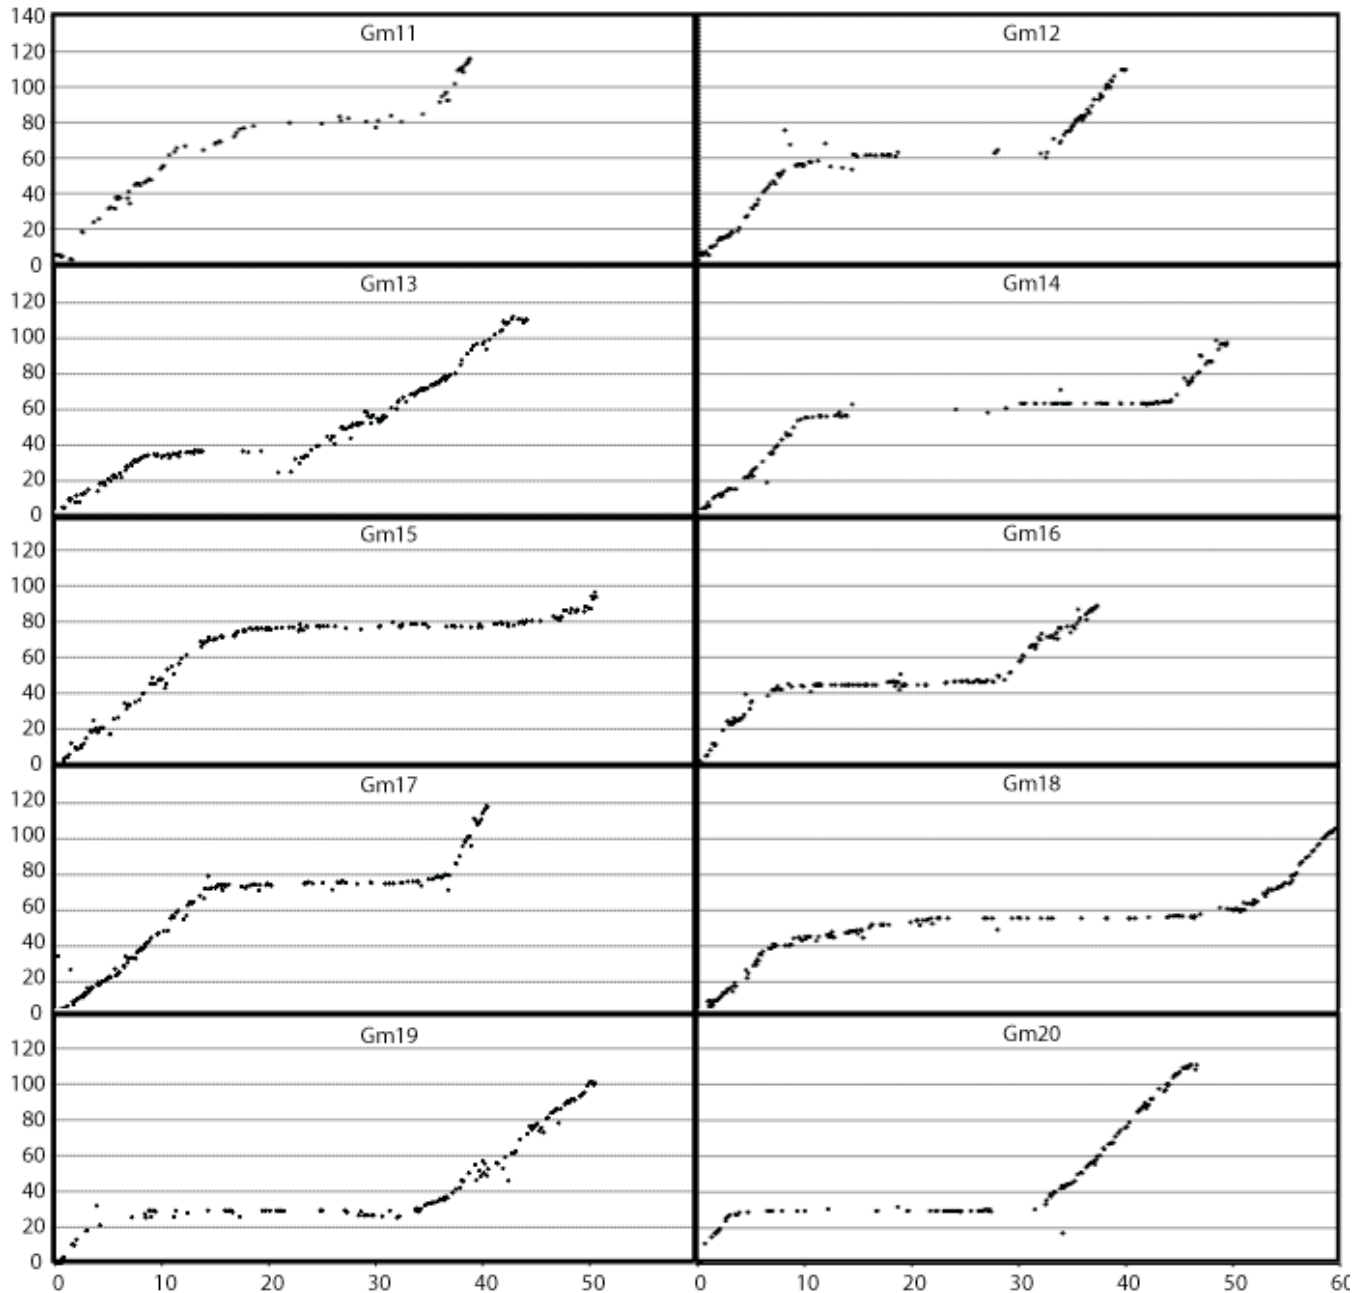

**Figure S1.** Plots of genetic-by-physical distances. In each plot, physical distance along the indicated pseudomolecule is on the horizontal axis (in 100 kb), and genetic distance is on the vertical axis (in cM). Dots show the locations of markers from the soybean 4.0 genetic map<sup>2</sup> on the sequence. There are 4,697 markers shown in these comparisons. Of these, 85% are SNP and the remainder SSR markers. The SNP markers were placed on the sequence with e-PCR<sup>3</sup>, and SSR markers with BLAST<sup>4</sup>. The average genetic-to-physical ratios are approximately 193 kb/cM in the euchromatic chromosome arms, and 4.2 Mb/cM (i.e. nearly flat) in the pericentromeric regions.

### 1.11. Comparison to other whole genome shotgun plant genome assemblies.

**Table S4.** Assembly statistics from published WGS plant genomes

| Genome Name                                        | Estimated Genome Size (Mbp) | Assembled Sequence Coverage | Assembled (Mbp)    | Portion Mapped (Mbp) <sup>A</sup> | Scaff -old N50  | Scaffold L50 (Mbp) | Contig N50         | Contig L50 (kb)    |
|----------------------------------------------------|-----------------------------|-----------------------------|--------------------|-----------------------------------|-----------------|--------------------|--------------------|--------------------|
| Soybean ( <i>Glycine Max</i> )                     | 1,115                       | 8.04x                       | 955.1              | 937.3                             | 10              | 47.8               | 1,492              | 189.4              |
| <i>Sorghum bicolor</i> <sup>1,2</sup>              | 818                         | 8.50x                       | 697.6              | 625.6                             | 6               | 62.4               | 958                | 195.4              |
| Poplar ( <i>Populus Trichocarpa</i> ) <sup>3</sup> | 550                         | 7.45x <sup>B</sup>          | 403.8 <sup>B</sup> | 370.4 <sup>B</sup>                | 9 <sup>B</sup>  | 18.8 <sup>B</sup>  | 448 <sup>B</sup>   | 242.2 <sup>B</sup> |
| <i>Physcomitrella patans</i> <sup>4</sup>          | 511                         | 8.92x <sup>B</sup>          | 466.7 <sup>B</sup> | -                                 | 86 <sup>B</sup> | 1.7 <sup>B</sup>   | 369 <sup>B</sup>   | 291.8 <sup>B</sup> |
| Grape ( <i>Vitis vinifera</i> ) <sup>5</sup>       | 475                         | 8.4x                        | 467.5 <sup>C</sup> | 290.2 <sup>C</sup>                | 14 <sup>C</sup> | 13.9 <sup>C</sup>  | 2,012 <sup>C</sup> | 66.4 <sup>C</sup>  |
| Rice ( <i>Oryza sativa</i> ) <sup>6</sup>          | 490                         | 5.87x                       | 410.7 <sup>C</sup> | 359.4 <sup>C</sup>                | 6 <sup>C</sup>  | 31.2 <sup>C</sup>  | 4,918 <sup>C</sup> | 23.2 <sup>C</sup>  |
| Papaya ( <i>Carica papaya</i> ) <sup>7</sup>       | >372Mb                      | <3x                         | 271.7 <sup>C</sup> | 235                               | 74 <sup>C</sup> | 1.3 <sup>C</sup>   | 7,109 <sup>C</sup> | 10.6 <sup>C</sup>  |

## Notes:

- A. This is the amount of sequence assigned to a distinct chromosome location; *Physcomitrella* is an unmapped release.
- B. These statistics represent a newer release than that published, but one that uses the same data set as the original release and was similarly assembled to soybean.
- C. These statistics were recalculated from the release to better match the ones presented for soybean, rather than presenting the numbers from the publication.

## References for Table S4:

- <sup>1</sup> Price et al. Genome evolution in the genus *Sorghum* (Poaceae). *Ann Bot.* **95**(1):219-27 (2005)
- <sup>2</sup> Paterson et al. The *Sorghum bicolor* genome and the diversification of grasses. *Nature* **457**, 551-556 (2009)
- <sup>3</sup> Tuskan, G. A. et al. The genome of black cottonwood, *Populus trichocarpa* (Torr. & Gray). *Science* **313**, 1596–1604 (2006)
- <sup>4</sup> Rensing et al. The *Physcomitrella* Genome Reveals Evolutionary Insights into the Conquest of Land by Plants. *Science* **319**, 64 – 69 (2008)
- <sup>5</sup> Jaillon, C. O. et al. The grapevine genome sequence suggests ancestral hexaploidization in major angiosperm phyla. *Nature* **449**, 463–467 (2007)

**Altschul SF, Madden TL, Schaffer AA, Zhang J, Zhang Z, Miller W, Lipman DJ (1997) Gapped BLAST and PSI-BLAST: a new generation of protein database search programs. *Nucleic Acids Res* **25**: 3389-3402**

**Gill N, Findley S, Walling JG, Hans C, Ma J, Doyle J, Stacey G, Jackson SA (2009) Molecular and chromosomal evidence for allopolyploidy in soybean, *Glycine max* (L.) Merr. *Plant Physiol***

- Hyten DL, Cannon SB, Song Q, Weeks NT, Fickus EC, Shoemaker RC, Specht JE, May GD, Cregan PB** (submitted) High-Throughput SNP Discovery through Deep Resequencing of a Reduced Representation Library to Anchor and Orient Scaffolds in the Soybean Whole Genome Sequence. *BMC Genomics* (**submitted**)
- Hyten DL, Choi I-Y, Song Q, Specht JE, Carter TE, Shoemaker RC, Hwang E-Y, Matukumalli LK, Cregan PB** (2009) A high density integrated genetic linkage map of soybean and the development of a 1,536 Universal Soy Linkage Panel for QTL mapping. *Genetics* (**submitted**)
- Jaffe DB, Butler J, Gnerre S, Mauceli E, Lindblad-Toh K, Mesirov JP, Zody MC, Lander ES** (2003) Whole-genome sequence assembly for mammalian genomes: Arachne 2. *Genome Res* **13**: 91-96
- Kurtz S, Phillippy A, Delcher AL, Smoot M, Shumway M, Antonescu C, Salzberg SL** (2004) Versatile and open software for comparing large genomes. *Genome Biol* **5**: R12
- Li H, Ruan J, Durbin R** (2008) Mapping short DNA sequencing reads and calling variants using mapping quality scores. *Genome Res* **18**: 1851-1858
- Lin JY, Jacobus BH, SanMiguel P, Walling JG, Yuan Y, Shoemaker RC, Young ND, Jackson SA** (2005) Pericentromeric regions of soybean (*Glycine max* L. Merr.) chromosomes consist of retroelements and tandemly repeated DNA and are structurally and evolutionarily labile. *Genetics* **170**: 1221-1230
- Luo MC, Thomas C, You FM, Hsiao J, Ouyang S, Buell CR, Malandro M, McGuire PE, Anderson OD, Dvorak J** (2003) High-throughput fingerprinting of bacterial artificial chromosomes using the snapshot labeling kit and sizing of restriction fragments by capillary electrophoresis. *Genomics* **82**: 378-389
- Nelson W, Soderlund C** (2009) Integrating sequence with FPC fingerprint maps. *Nucleic Acids Res* **37**: e36
- Peto M, Shoemaker RC, Cannon SB** (in preparation) Applying small-scale DNA signatures as an aid in assembling soybean chromosome sequences. *Advances in Bioinformatics*
- Schuler GD** (1997) Sequence mapping by electronic PCR. *Genome Res* **7**: 541-550
- Shoemaker RC, Grant D, Olson T, Warren WC, Wing R, Yu Y, Kim H, Cregan P, Joseph B, Futrell-Griggs M, Nelson W, Davito J, Walker J, Wallis J, Kremitski C, Scheer D, Clifton SW, Graves T, Nguyen H, Wu X, Luo M, Dvorak J, Nelson R, Cannon S, Tomkins J, Schmutz J, Stacey G, Jackson S** (2008) Microsatellite discovery from BAC end sequences and genetic mapping to anchor the soybean physical and genetic maps. *Genome* **51**: 294-302
- Soderlund C, Humphray S, Dunham A, French L** (2000) Contigs built with fingerprints, markers, and FPC V4.7. *Genome Res* **10**: 1772-1787

## S2. Annotation Results

**S2.1. Phytozome clustering method.** The evolutionary based gene family is a collection of modern day genes which represent one gene in the common ancestor at that node. Families are constructed at each node on the species tree. For example, at the angiosperm node each gene family is a collection of grape, Arabidopsis, poplar, rice, and sorghum genes which are the modern descendants of one gene in

the common angiosperm ancestor. When constructing the gene families we consider two avenues for gene creation: speciation and duplication. When speciation occurs each daughter lineage receives one copy of each gene. A pair of genes, one from each lineage, coming from the same mother gene are said to be orthologs. Speciation events happen at the nodes of the species tree. Gene duplication events happen along the edges of the species tree. They result from the duplication of a gene within a species. This can either be whole-genome duplication or a local duplication. Genes related via duplication are called paralogs.

The Phytozome clustering algorithm accommodates multiple rounds of genome-wide duplications amongst the plants by using synteny to assign orthologs. The 4DTV (4-fold degenerate transversions) distance of speciation is well-defined for the angiosperm and more recent nodes. This can be used to find orthologous segments from the era of the speciation. Blast alignments of the peptide sets are performed between all species and within each species. Syntenic segments with a maximum of 10 non-aligning genes between pairs of aligning genes ( $E\text{-value} < 1e-18$ ) are found within and between species. Orthologs are assigned as genes that occur on syntenic segments from the appropriate 4DTV era in which mutual-best hits account for at least 20% of hits on that segment. Mutual-best hits not in syntenic segments are also considered orthologs. Paralogs were added to these orthologous clusters by examining all hits from genes not already in clusters to these orthologous clusters. Genes are added as paralogs to their best-hitting cluster if the blast score to its putative paralog is better than the best blast score between genes already in that cluster. The clustering algorithm is hierarchical, starting at the tree tips with the modern day organisms, and marches backwards in time capturing duplications along the edges and orthologs at the nodes. It is also nested, such that any cluster of genes in recent clusters remain together in more ancient clusters.

Gene family numbers represented in this paper are the phytozome v. 4 clusterings at the angiosperm node. Legume-specific gene families refer to families that contain at least two legume (soybean or medicago) genes but no other angiosperm representatives.

**S2.2. Assigning gene confidence.** The initial annotation set was examined for common problems.

Genes were then scored on the basis of the following common negative characteristics: contains a TE-related domain annotation, has low sequence entropy, contains an intron shorter than 40 bp, is homologous to and less than 30% the length of another gene annotation in the genome, is missing a start

or stop codon, and has a low C-score (where c-score = (blast score of hit)/(best blast score)) to reference proteomes of poplar, grapevine, and Arabidopsis.

Genes were also scored for the following positive qualities: contains an annotated domain, best hit unigene coverage is > 70%, clusters with at least three rosids represented, and is covered by an EST. Each gene was given a combined log-odds score by determining the log odds ratio assuming genes with syntenic paralogous (within soybean) or orthologous genes are true positives. The log odds scores for each parameter are reported in Supplemental Table S.7. The log odds scores were added to give a total score. After examination of the distribution of scores in Supplemental Figure S.9 a cutoff of -2 was chosen to distinguish high confidence from lower confidence genes.

**Table S5.** Gene clusters of angiosperm and soybean (included as separate data file).

| <b>Classification</b>           | <b>Copy Number</b> | <b>DNA Content (bp)</b> | <b>DNA Content %</b> |
|---------------------------------|--------------------|-------------------------|----------------------|
| <b>Class I :Retrotransposon</b> | 313,125            | 403,374,706             | 42.24                |
| <b>LTR-Retrotransposon</b>      | 309,705            | 401,002,695             | 41.99                |
| Ty1/copia                       | 124,516            | 119,103,911             | 12.47                |
| Intact elements                 | 4,913              | 32,223,498              | 3.37                 |
| Solo LTRs                       | 8,405              | 12,877,970              | 1.35                 |
| Truncated elements/fragments    | 111,198            | 74,002,443              | 7.75                 |
| Ty3/gypsy                       | 185,189            | 281,898,784             | 29.52                |
| Intact elements                 | 9,193              | 97,259,046              | 10.18                |
| Solo LTRs                       | 9,859              | 14,510,106              | 1.52                 |
| Truncated elements/fragments    | 166,137            | 170,129,632             | 17.82                |
| <b>Non-LTR Retrotransposon</b>  | 3,420              | 2,372,011               | 0.25                 |
| LINE                            | 3,420              | 2,372,011               | 0.25                 |
| <b>Class II DNA Transposon</b>  | 294,937            | 157,551,529             | 16.50                |
| <b>Subclass I:</b>              | 287,809            | 152,481,672             | 15.97                |
| Tc1/Mariner                     | 536                | 243,206                 | 0.03                 |
| hAT                             | 938                | 379,651                 | 0.04                 |
| Mutator                         | 100,571            | 43,259,871              | 4.53                 |
| PIF/Harbinger                   | 10,207             | 2,810,474               | 0.29                 |
| Pong                            | 1,755              | 851,918                 | 0.09                 |
| CACTA                           | 127,467            | 97,015,991              | 10.16                |
| MITE                            | 46,335             | 7,920,560               | 0.83                 |
| Tourist                         | 19,168             | 3,192,179               | 0.33                 |
| Stowaway                        | 27,167             | 4,728,381               | 0.50                 |

|                       |         |             |       |
|-----------------------|---------|-------------|-------|
| <b>Subclass II:</b>   | 7,128   | 5,069,857   | 0.53  |
| Helitron              | 7,128   | 5,069,857   | 0.53  |
| <b>Satellites*</b>    | 11,004  | 11,315,839  | 1.18  |
| <b>Simple repeats</b> | 91,939  | 4,410,941   | 0.46  |
| <b>Low complexity</b> | 126,553 | 10,448,074  | 1.09  |
| <b>Total</b>          | 837,558 | 587,101,089 | 61.47 |

\*copy numbers underestimated due to the intergration of larger tandem arrays in a single unit by the Repeatmasker program.

**Table S6.** Repetitive composition and major components of the soybean genome.

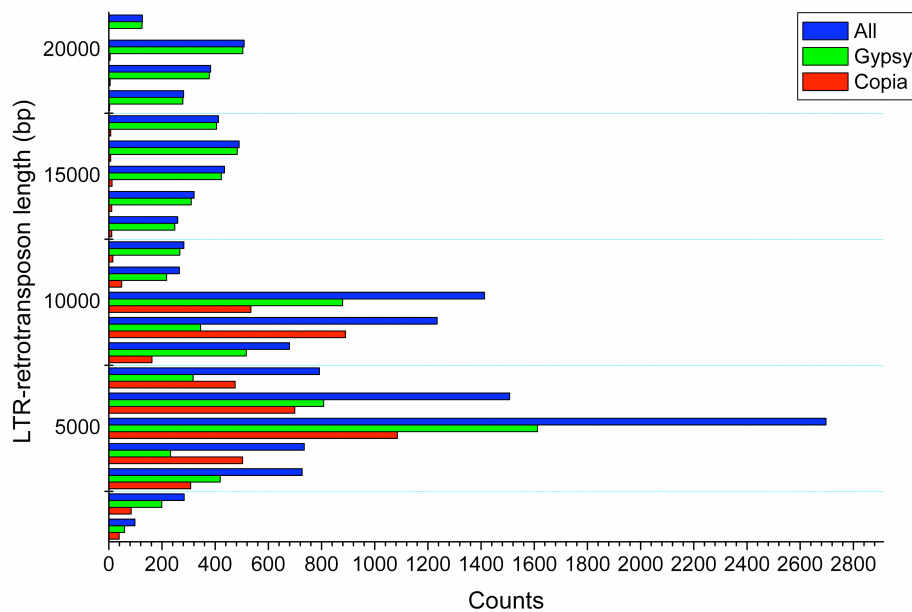

**Table S.7.** Log odds scores associated with presence of gene characteristics.

|                | TE-related | Low entropy | short intron | small copy | incomplete | low c-score | no unigene | annotated domain | good unigene coverage | high confidence cluster | est coverage |
|----------------|------------|-------------|--------------|------------|------------|-------------|------------|------------------|-----------------------|-------------------------|--------------|
| <b>present</b> | -1.29      | -2.38       | -.042        | -3.83      | -1.27      | -2.87       | -4.13      | 0.68             | 5.39                  | 3.49                    | 0.99         |
| <b>absent</b>  | 0.09       | 0.03        | 0.09         | 0.39       | 1.19       | 2.25        | 0.15       | -1.21            | -2.26                 | -1.39                   | -1.20        |

**Figure S2.** LTR-retrotransposon counts in the soybean genome

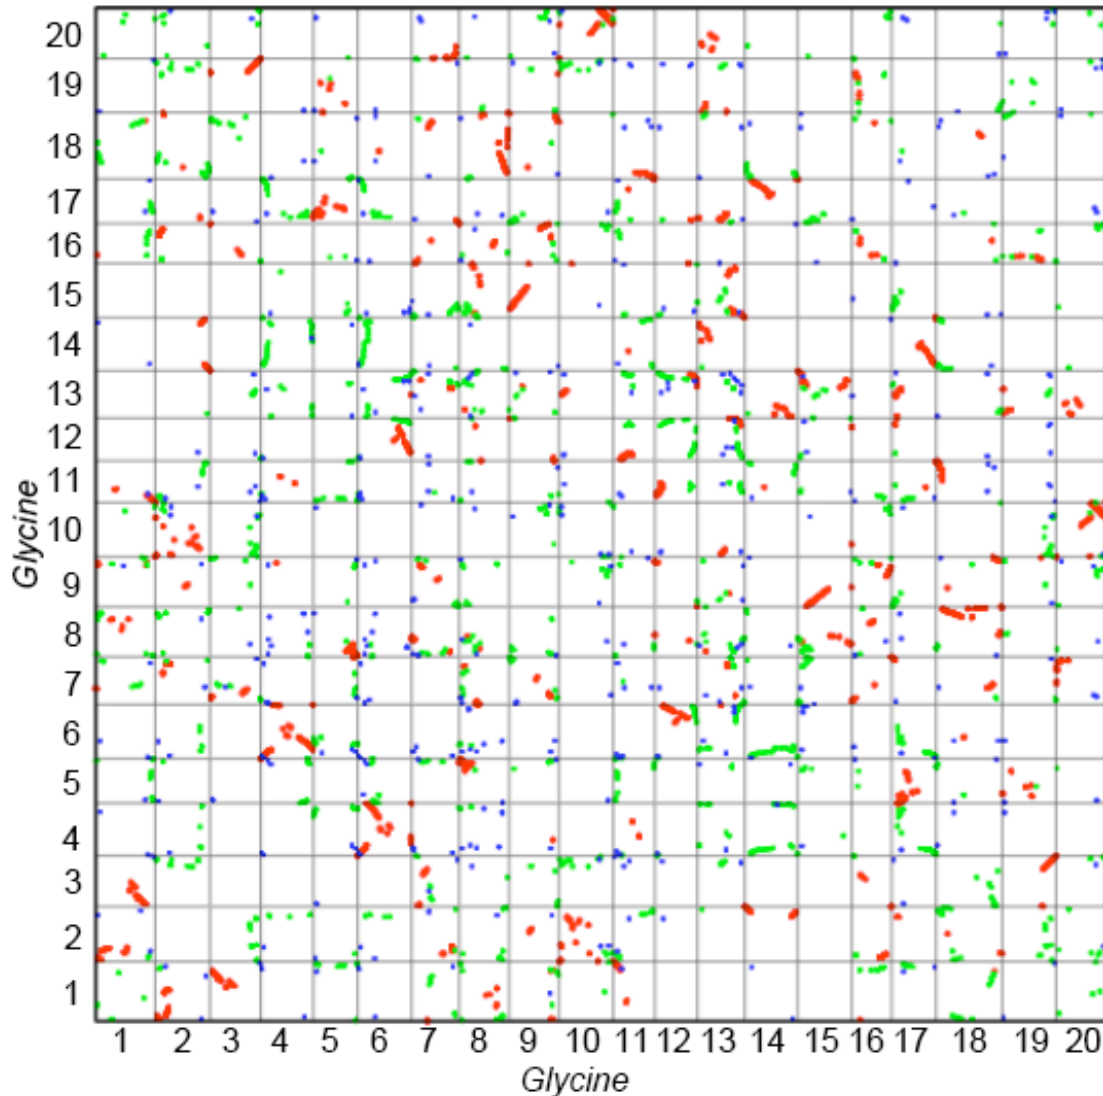

**Figure S5.** Syntenic paralogs from the three whole genome duplications in *Glycine max*. Red dots represent genes from the 4DTV range of 0.029-0.11, green dots from 0.11-0.3, and blue dots from 0.33-0.5. Syntenically orthologous pairs are plotted based on chromosomal position. Syntenic orthologs were calculated by finding segments for which there were a maximum of 5 non-aligning genes between aligning genes within segment pairs. Aligning genes were defined by a blast e-value of  $1e-18$  or less. Genes are plotted if they form segments larger than those observed in those found in a simulated randomized genome with the same numbers of genes.

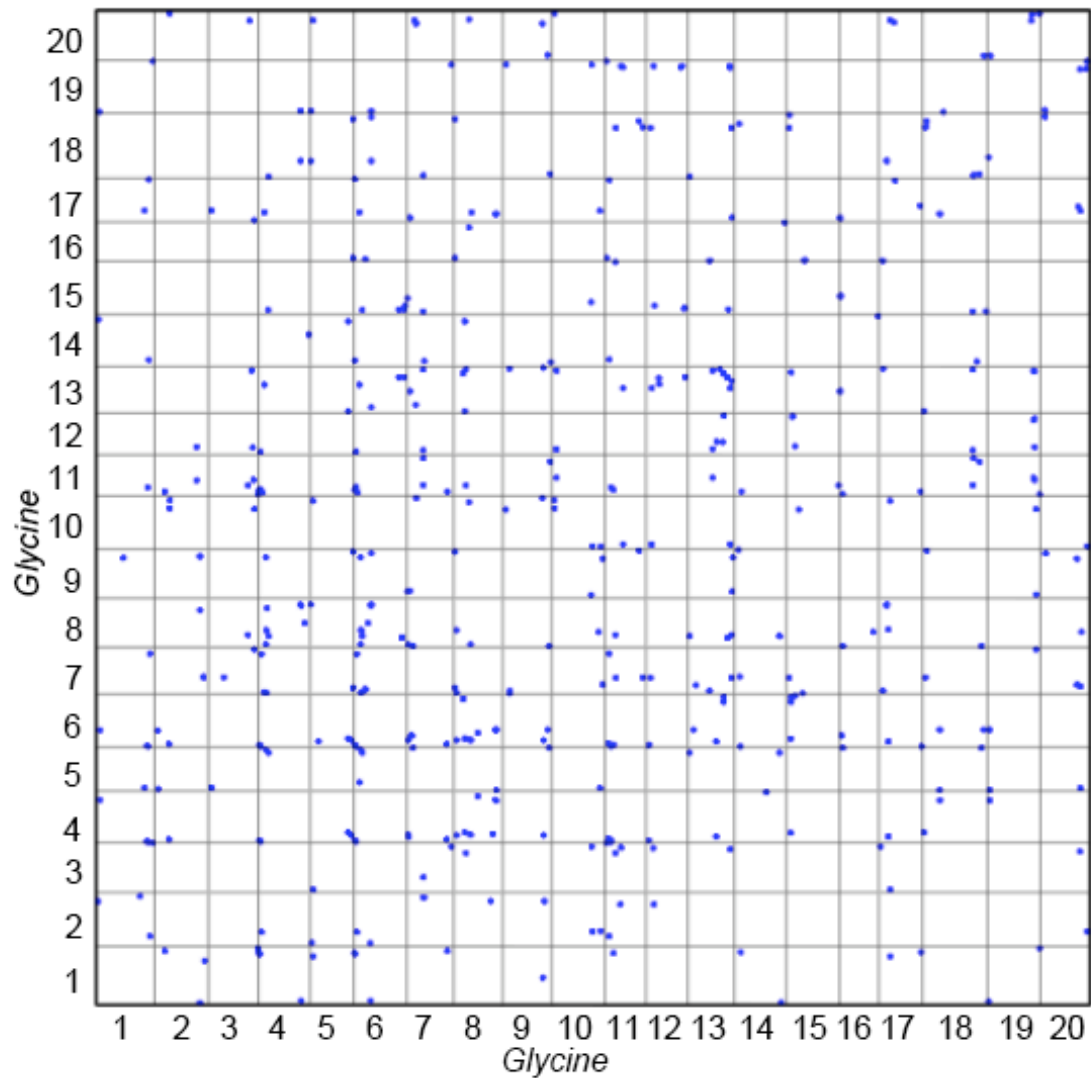

**Figure S6.** Syntenic paralogs from the oldest genome duplication(s) in *Glycine max*. Dots represent paralogous regions with 4DTv in the range of 0.33-0.5. These may date to the pre-rosid triplication event described in Jalion et al. (2007).

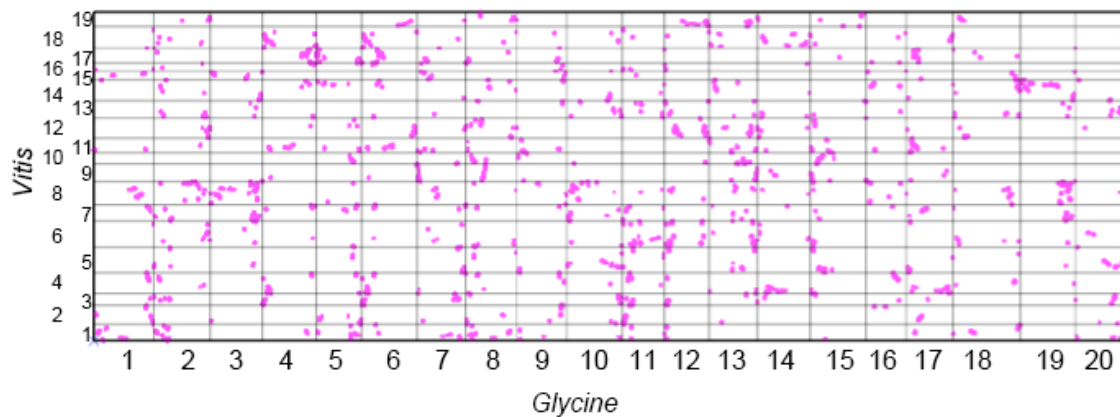

**Figure S7.** Syntenic orthologs between *Glycine max* and *Vitis vinifera*. Dots represent paralogous regions with



4DTv in the range of 0.36 to 0.52, characteristic of this species divergence.

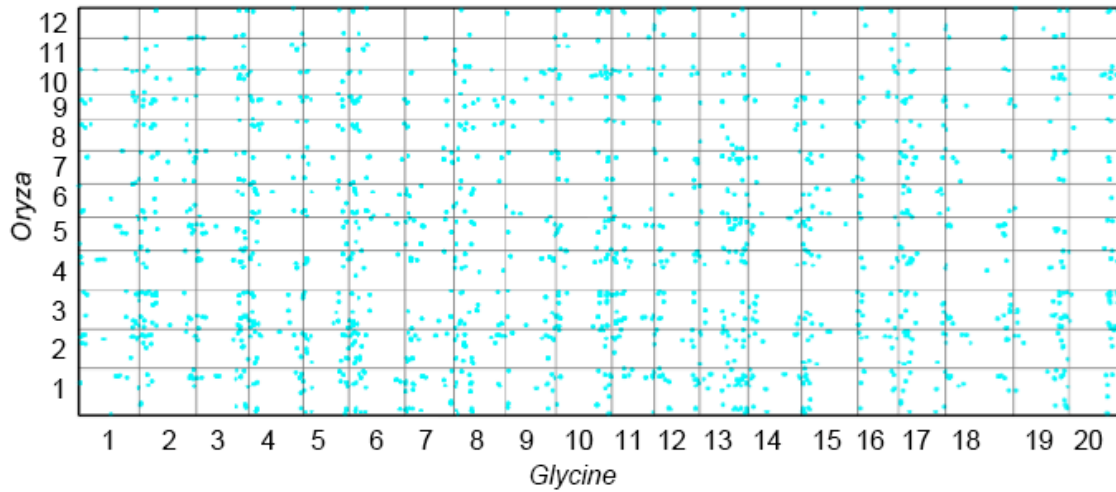

**Figure S8.** Syntenic orthologs between *Glycine max* and *Oryza sativa*. Dots represent paralogous regions with 4DTv in the range of 0.25 to 0.36, characteristic of this species divergence.

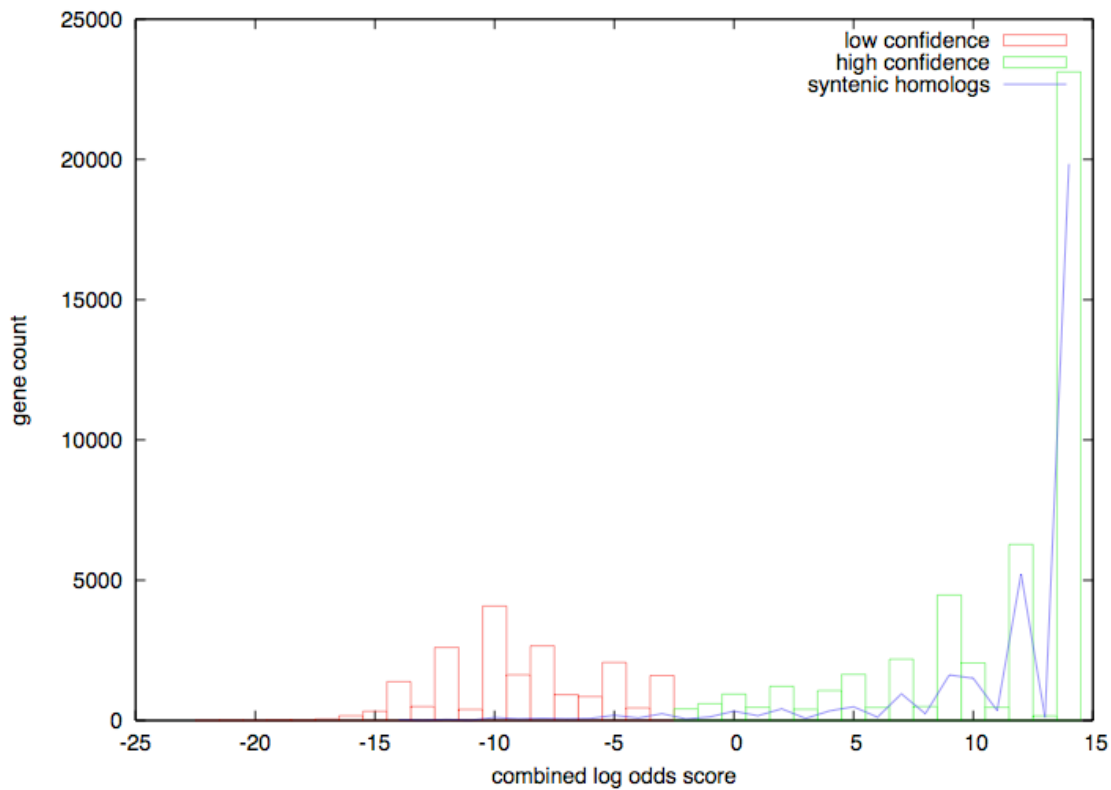

**Figure S9.** Combined log odds scores for all initial gene predictions.

### S3. Computational analysis of nodulation genes in the soybean genome

In order to identify soybean genes involved in nodulation, we searched for soybean genes orthologous to nodulation-related genes identified through studies of other legumes. Thirty-four sequences of soybean nodulin genes were extracted from the NCBI database. A BLASTp search, with an E-value cutoff at  $1e-15$ , identified 23 out of 34 soybean nodulins in the Glyma1 dataset. The remaining 11 soybean nodulins were not found in the Glyma1 dataset, even though the E-value cutoff was set at  $1e-5$ . The absence of these genes is likely due to fragmentation of the query sequences or the unsaturated annotation of the soybean genome. Similarly, we extracted 18 nodulin sequences from other legumes. BLASTp ( $e^{-15}$ ) identified putative orthologs of six of these genes in the Glyma1 dataset. The remaining 12 nodulin genes, mostly representing ENOD2 and ENOD40-like sequences, are very short and did not match the Glyma1 dataset. To identify the key regulatory genes whose orthologs are required for nodulation in other legumes, we extracted 36 genes from the NCBI database, most of them encoding receptor-like kinases and transcription factors. However, some orthologous genes carry different names in different species. Therefore, for our analysis it was important to first identify a unique gene set for comparison to soybean. For example, our analyses showed that seven genes in *Lotus japonicus*, NFR1, NFR5, SYMRK, Pollux, CCaMK, NIN, and HAR1 have orthologs in *Medicago truncatula* and pea (Table S7). *Lotus* NFR5 is orthologous to *Medicago* NFP and *Pisum* SYM10<sup>15, 16</sup>. Taking into account these orthologous relationships, a total of 23 key regulatory, nodulation genes were identified from *Lotus*, *Medicago* and pea. BLASTp ( $E^{-50}$ ) identified putative orthologs of all 23 genes in the Glyma1 dataset.

Starting from this initial list of putative soybean nodulation gene orthologs, we tentatively defined the orthologous and paralogous relationships of these genes based on the sequence alignments, phylogenetic analyses, and non-synonymous nucleotide substitution levels (Ks). Sequences were aligned using MUSCLE3.6<sup>17</sup>, and manually inspected using Jalview<sup>18</sup>. Majority-rule parsimony trees were calculated using the program “protpars” in the PHYLIP package<sup>19</sup>. The annotations were performed by querying the protein sequences against the Pfam database (<http://pfam.sanger.ac.uk/>) and the InterProScan database (<http://www.ebi.ac.uk/Tools/InterProScan/>). This analysis led to the identification of 26 nodulin genes and 24 key regulatory genes in the Glyma1 dataset, which likely represent true orthologs of known nodulation related genes identified in other species (Table S8).

Among this list of 50 identified soybean nodulation genes, 32 genes have at least one highly conserved homolog gene (Table S7). Sequence comparisons between these gene pairs showed that peptide sequence identity ranges from 80~98% (Data not shown). Given the fact that the soybean genome underwent one round of recent homeologous duplication about 13 million years ago (Mya)<sup>20-22</sup>, we hypothesize that these are homeologous gene pairs. Indeed, pairwise comparisons of the non-synonymous nucleotide substitution level (Ks) reveal a peak at  $0.0996 \pm 0.0082$  (Figure S9), suggesting the presence of a large-scale gene duplication. Assuming a rate of 6.1 synonymous substitutions per site every one billion years<sup>23</sup>, the values estimate this duplication event at approximately 13 Mya, which is consistent with previous studies<sup>20-22</sup>. We also identified paralogs of 13 soybean nodulation-related genes (Table S8).

Analysis of 8 of the soybean nodulation genes suggests the presence of different transcript variants (2-11 depending on the gene). The exceptional example is Nodulin-24 (Glyma14g05690.1), which produces 10 transcript variants (Table S8). In total, 16% of the examined nodulation-related genes produce alternatively spliced transcripts, which is slightly lower than the incidence of alternative splicing in *Arabidopsis* (~21.8%) and rice (~21.2%)<sup>24</sup>.

## REFERENCES

1. Jaffe, D. B. et al. Whole-genome sequence assembly for mammalian genomes: Arachne 2. *Genome Res* 13, 91-6 (2003).
2. Hyten, D. L. et al. A high density integrated genetic linkage map of soybean and the development of a 1,536 Universal Soy Linkage Panel for QTL mapping. *Genetics* (submitted) (2009).
3. Schuler, G. D. Sequence mapping by electronic PCR. *Genome Res* 7, 541-50 (1997).
4. Altschul, S. F. et al. Gapped BLAST and PSI-BLAST: a new generation of protein database search programs. *Nucleic Acids Res* 25, 3389-402 (1997).
5. Hyten, D. L. et al. High-Throughput SNP Discovery through Deep Resequencing of a Reduced Representation Library to Anchor and Orient Scaffolds in the Soybean Whole Genome Sequence. *BMC Genomics* (submitted) (submitted).
6. Li, H., Ruan, J. & Durbin, R. Mapping short DNA sequencing reads and calling variants using mapping quality scores. *Genome Res* 18, 1851-8 (2008).
7. Kurtz, S. et al. Versatile and open software for comparing large genomes. *Genome Biol* 5, R12 (2004).
8. Gill, N. et al. Molecular and chromosomal evidence for allopolyploidy in soybean, *Glycine max* (L.) Merr. *Plant Physiol* (2009).

9. Lin, J. Y. et al. Pericentromeric regions of soybean (*Glycine max* L. Merr.) chromosomes consist of retroelements and tandemly repeated DNA and are structurally and evolutionarily labile. *Genetics* 170, 1221-30 (2005).
10. Peto, M., Shoemaker, R. C. & Cannon, S. B. Applying small-scale DNA signatures as an aid in assembling soybean chromosome sequences. *Advances in Bioinformatics* (in preparation).
11. Shoemaker, R. C. et al. Microsatellite discovery from BAC end sequences and genetic mapping to anchor the soybean physical and genetic maps. *Genome* 51, 294-302 (2008).
12. Luo, M. C. et al. High-throughput fingerprinting of bacterial artificial chromosomes using the snapshot labeling kit and sizing of restriction fragments by capillary electrophoresis. *Genomics* 82, 378-89 (2003).
13. Soderlund, C., Humphray, S., Dunham, A. & French, L. Contigs built with fingerprints, markers, and FPC V4.7. *Genome Res* 10, 1772-87 (2000).
14. Nelson, W. & Soderlund, C. Integrating sequence with FPC fingerprint maps. *Nucleic Acids Res* 37, e36 (2009).
15. Arrighi, J. et al. The *Medicago truncatula* lysin motif-receptor-like kinase gene family includes NFP and new nodule-expressed genes. *Plant Physiol.* 142, 265-279 (2006).
16. Madsen, E. B. et al. A receptor kinase gene of the LysM type is involved in legume perception of rhizobial signals. *Nature* 425, 637-640 (2003).
17. Edgar, R. C. MUSCLE: multiple sequence alignment with high accuracy and high throughput. *Nucleic acids Res.* 32, 1792-1797 (2004).
18. Clamp, M., Cuff, J., Searle, S. M. & Barton, G. J. The Jalview Java alignment editor. *Bioinformatics* 20, 426-427 (2004).
19. Felsenstein, J. PHYLIP (Phylogeny Inference Package) (**Distributed by the Author**. Seattle:Department of Genetics, University of Washington, 2000).
20. Schlueter, J. A. et al. Mining EST databases to resolve evolutionary events in major crop species. *Genome* 47, 868-876 (2004).
21. Pfeil, B. E., Schlueter, J. A., Shoemaker, R. C. & Doyle, J. J. Placing paleopolyploidy in relation to taxon divergence: A phylogenetic analysis in legumes using 39 gene families. *System. Biol.* 54, 441-454 (2005).
22. Lavin, M., Herendeen, P. S. & Wojciechowski, M. F. Evolutionary rates analysis of Leguminosae implicates a rapid diversification of lineages during the tertiary. *System. Biol.* 54, 575-94 (2005).
23. Lynch, M. & Connery, J. S. The evolutionary fate and consequences of duplicate genes. *Science* 299, 1151-1155 (2000).
24. Wang, B. B. & Brendel, V. Genomewide comparative analysis of alternative splicing in plants. *Proc. Natl. Aca. Sci. USA* 103, 7175-7180 (2006).
25. Choi, I. Y. et al. A soybean transcript map: gene distribution, haplotype and single-nucleotide polymorphism analysis. *Genetics* 176, 685-96 (2007).
26. Song, Q. J. et al. A new integrated genetic linkage map of the soybean. *Theor Appl Genet* 109, 122-8 (2004).
27. Skoneczka, J., Saghai Maroof, M. A., Shang, C. & Buss, G. R. Identification of candidate gene mutation associated with low stachyose phenotype in soybean line PI 200508. *Crop Sci.* 49, in press (2009).
28. Saghai Maroof, M. A., Glover, N. M., Biyashev, R. M., Buss, G. R. & Grabau, E. A. Genetic basis of the phytate trait in the soybean line CX1834. *Crop Sci.* 49, in press (2009).
29. Connaly, E. L. & Guerinot, M. L. Iron stress in plants. *Genome Biol* 3, 1024.1-1024.4 (2002).

30. Schmidt, W. Iron solutions: acquisition strategies and signaling pathways in plants. *Trends Plant Sci* 8, 188-93 (2003).
31. Lin, S., Baumer, J. S., Ivers, D., Cianzio, S. & Shoemaker, R. C. Field and nutrient solution tests measure similar mechanisms controlling iron deficiency chlorosis in soybean. *Crop Sci.* 38, 254-259 (1998).
32. Lin, S., Cianzio, S. & Shoemaker, R. C. Mapping genetic loci for iron deficiency chlorosis in soybean. *Mol Breeding* 3, 219-229 (1997).
33. Bauer, P., Ling, H. Q. & Guerinot, M. L. FIT, the FER-LIKE IRON DEFICIENCY INDUCED TRANSCRIPTION FACTOR in Arabidopsis. *Plant Physiol Biochem* 45, 260-1 (2007).
34. Vert, G. et al. IRT1, an Arabidopsis transporter essential for iron uptake from the soil and for plant growth. *Plant Cell* 14, 1223-33 (2002).

**Table S8.** Computational analysis of putative nodulation genes in soybean (included as separate file)

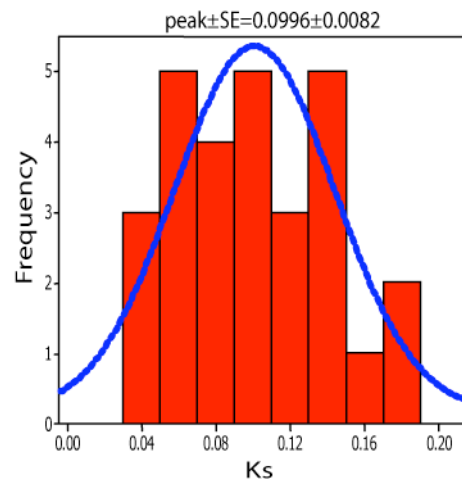

**Figure S10.** Histogram plots of pairwise synonymous distance of nodulation related genes in soybean. Y-axis denotes the frequency and x-axis denotes the synonymous distance (Ks). The blue line indicates the presence of one round of large-scale gene duplications.

#### S4. Soybean transcription factors

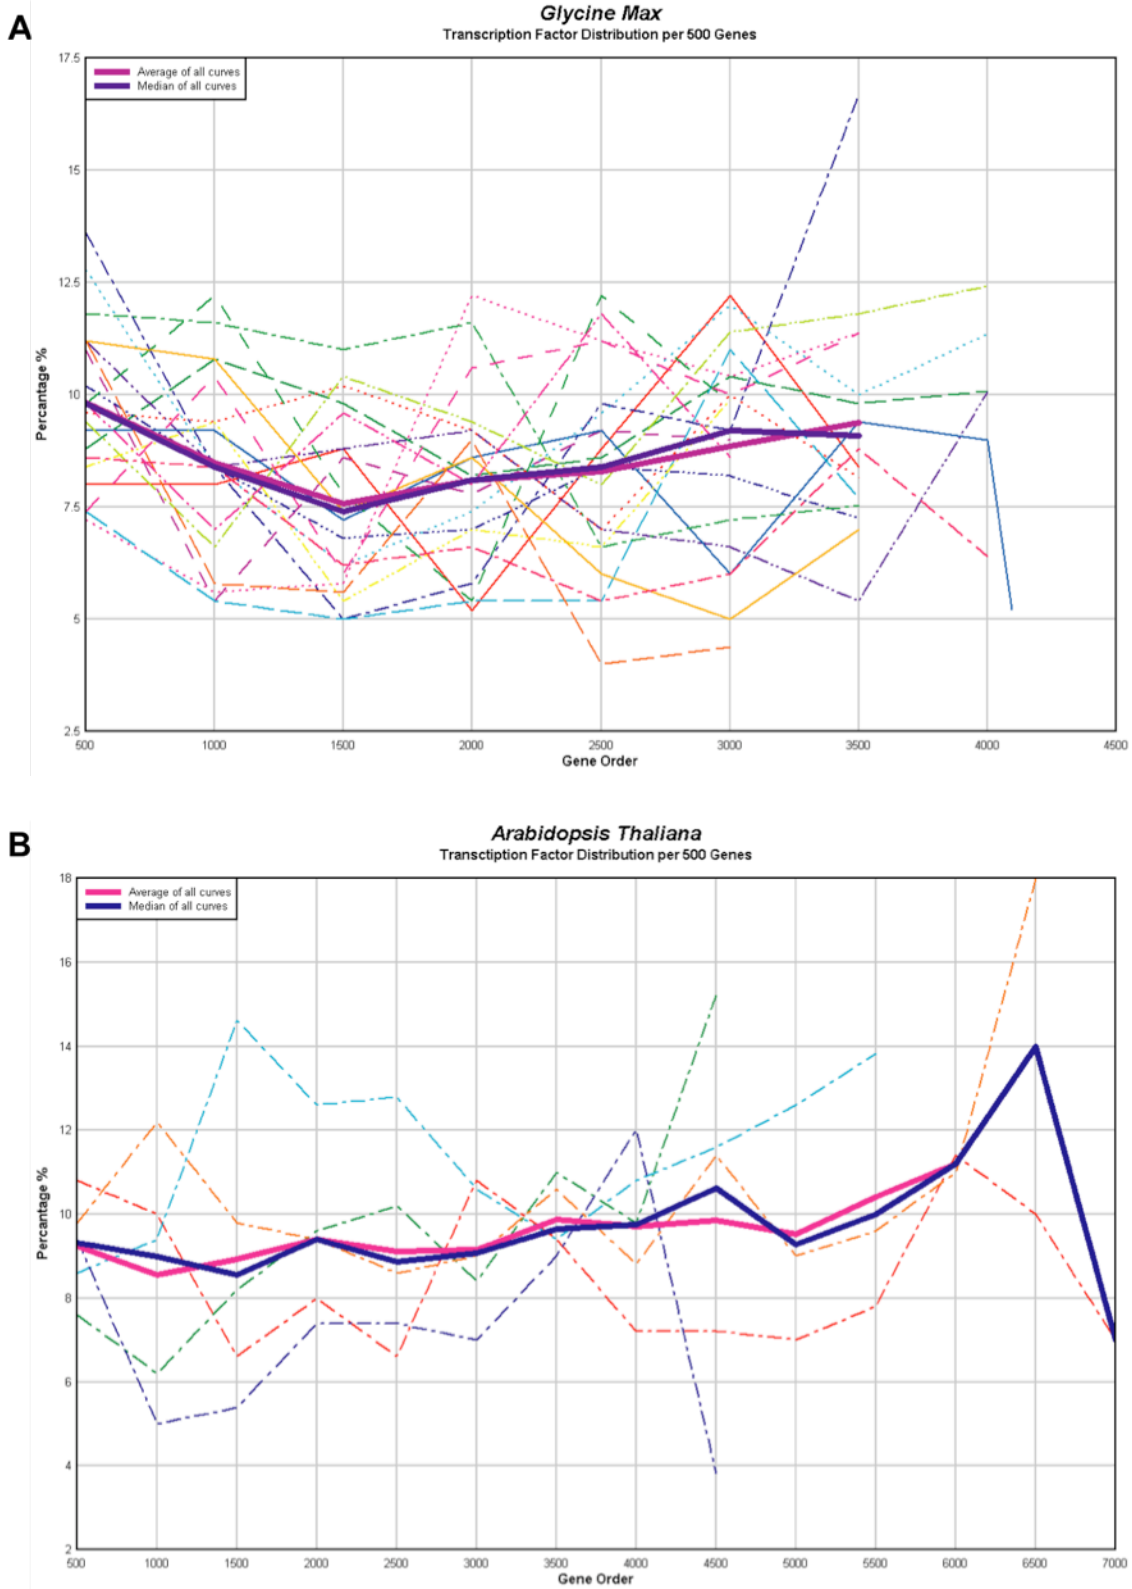

**Figure S11.** Transcription factor genes density compared to total soybean (A) and *Arabidopsis* (B) genes density. The percentage of TF genes is shown for each of 20 soybean and 5 *Arabidopsis*

chromosomes (thin lines). The average and mean density of TF genes between chromosomes are indicated for both species (bold lines).

|                                    | Soybean     |      | <i>A. thaliana</i> |       |
|------------------------------------|-------------|------|--------------------|-------|
|                                    | number      | %    | number             | %     |
| ABI3/VP1                           | 78          | 1.4% | 71                 | 3.1%  |
| AP2-EREBP                          | 381         | 7%   | 146                | 6%    |
| AS2                                | 92          | 2%   | 43                 | 2%    |
| AUX-IAA-ARF                        | 129         | 2%   | 51                 | 2%    |
| bHLH                               | 393         | 7%   | 172                | 7%    |
| BROMODOMAIN                        | 57          | 1%   | 29                 | 1%    |
| BTB/POZ                            | 145         | 3%   | 98                 | 4%    |
| BZIP                               | 176         | 3%   | 78                 | 3%    |
| C2C2 (Zn) CO-like                  | 72          | 1%   | 34                 | 1%    |
| C2C2 (Zn) Dof                      | 82          | 1%   | 36                 | 2%    |
| C2C2 (Zn) GATA                     | 62          | 1%   | 29                 | 1%    |
| C <sub>2</sub> H <sub>2</sub> (Zn) | 395         | 7%   | 173                | 7%    |
| C <sub>3</sub> H-type1(Zn)         | 147         | 3%   | 69                 | 3%    |
| CCAAT                              | 106         | 2%   | 38                 | 2%    |
| CCHC (Zn)                          | 144         | 3%   | 66                 | 3%    |
| GRAS                               | 130         | 2%   | 33                 | 1%    |
| Homeodomain/HOMEBOX                | 319         | 6%   | 112                | 5%    |
| JUMONJI                            | 77          | 1%   | 21                 | 1%    |
| MADS                               | 212         | 4%   | 109                | 5%    |
| MYB                                | 65          | 1%   | 24                 | 1%    |
| MYB/HD-like                        | 726         | 13%  | 279                | 12%   |
| NAC                                | 208         | 4%   | 114                | 5%    |
| PHD                                | 222         | 4%   | 55                 | 2%    |
| SNF2                               | 69          | 1%   | 33                 | 1%    |
| TCP                                | 65          | 1.1% | 6                  | 0.30% |
| TPR                                | 319         | 6%   | 65                 | 3%    |
| WRKY                               | 197         | 3%   | 73                 | 3%    |
| ZF-HD                              | 54          | 1%   | 17                 | 1%    |
| others                             | 561         | 10%  | 241                | 10%   |
| <b>TOTAL</b>                       | <b>5683</b> |      | <b>2315</b>        |       |

**Table S9.** List of soybean and *Arabidopsis* TF genes. TF gene distribution among the different TF families and identification of tandemly duplicated TF genes both species.

## S5. Detail of QTL trait experiments bolstered by the available genome sequence

QTL mapping studies have been ongoing for more than 90 distinct traits of soybean. These traits include plant developmental and reproductive characters, disease resistance, seed quality, and nutritional traits. In most cases, the causal functional gene or transcription factor underlying the QTL still remains a mystery. However, the integration of the whole genome sequence with the dense genetic marker map

that now exists in soybean<sup>25, 26</sup> (<http://www.soybase.org>) will allow the association of mapped phenotypic effectors with the causal DNA sequence. There are already examples where the availability of the soybean genomic sequence has accelerated these discovery efforts to improve soybean as a crop species.

In one case, the genome sequence allowed the positioning of a low stachyose locus to the whole genome assembly which permitted the cloning and identification of the locus termed *rsm1* (raffinose synthase mutation). Two soybean seed carbohydrate components, raffinose and stachyose, are difficult for animals and humans to digest, and can cause off-flavors, gastric discomfort, and flatulence. Skoneczka et al.<sup>27</sup> mapped low seed stachyose, a qualitatively inherited trait present in accession PI 200508 (i.e., the recessive *styla*) to a 12 cM interval between publicly available microsatellite markers. The authors used the sequences of the markers flanking the locus to identify a segment within the genomic sequence potentially containing the causal gene. Fine mapping and analysis of the predicted genes in the mapped interval identified one gene with homology to galactosyltransferase, which seemed to be the lone candidate gene of 66 possibilities. Candidate gene sequence comparison between three wild-type seed stachyose levels (two parental lines, plus Williams 82) versus the low stachyose parental line, revealed a sequence polymorphism (i.e., a 3 bp deletion) found only in the low stachyose line. The authors then developed a gene-specific microsatellite marker that can be conveniently used for marker-assisted selection of low stachyose lines.

In another example, Saghai-Marooof et al.<sup>28</sup> used the Williams 82 WGS to search for gene candidates underlying two QTL for low seed phytate in the germplasm line CX1834, one of which mapped to chromosome 19 and the other to chromosome 12. Phytate is a major storage form of phosphorus in the soybean seed, but is poorly digested by non-ruminants (i.e., swine and poultry). The phytate excreted in the manure of non-ruminants eventually reaches wetlands, rivers, and lakes, which causes serious environmental consequences. The authors, who were aware that a defective MRP ABC transporter was the candidate gene for the maize low phytate mutant *lpa1*, used the maize MRP4 gene to search against the soybean WGS and obtained positive matches on soybean chromosome 12 and 19, both tightly linked to phytate QTL. Comparative sequencing of the MRP homolog in CX1834 and in Williams 82 revealed a single base mutation from A (wild-type) to T (mutant), resulting in a stop codon (a truncated protein product). In yet another example, the first resistance gene for the devastating disease Asian Soybean



Rust (ASR) has been cloned with the aid of the soybean genomic sequence and confirmed with viral induced gene silencing (Meyer et al. 2009). In countries where ASR is well established, soybean yield losses due to the disease can range from 10 to 80 percent<sup>35-37</sup> and the development of soybean strains resistant to ASR will greatly benefit the world.

As a final example, it is known that iron is essential for plant function and plays important roles in electron transport chains of photosynthesis and respiration<sup>29</sup>. Iron is abundant in the earth mantle yet remains in a largely inaccessible form for plants to utilize. Nearly two-thirds of the world's population is at risk for iron-induced anemia and the major source of iron for humans is through plants<sup>30</sup>. Iron-deficient chlorosis (IDC) causes yield reduction in many crop plants and is a complex quantitative trait whose manipulation has been recalcitrant for breeders. Several QTL for IDC have been mapped in soybean populations<sup>31,32</sup>. Although many of the genes involved in the mechanisms of iron acquisition, uptake and transport have been identified<sup>30</sup>, the causal gene(s) underlying the phenotypes associated with each IDC QTL remain largely unknown. Searches of the WGS assembly have generated some noteworthy possibilities: A FIT homolog (FER-like Iron Deficiency Induced Transcription Factor;<sup>33</sup> lies within an iron QTL on chromosome 12 and an IRT [Iron Transporter<sup>34</sup>] homolog lies within a QTL on chromosome 14 (unpublished). Whether these candidates are causal to the trait locus remains to be proven, however with the availability of the soybean genome sequence the flood-gates are open to uncover nearly limitless possibilities for genetic discovery and soybean crop improvement.
